# Supplementary material
Source: PubMed Central journal article supplement (PMC152306)
Supplement: pnas_0530278100_1.pdf [file pnas_0530278100_1.pdf]

**Table 1. Genes encoding candidate secreted proteins overexpressed in carcinomas**

| <i>Gene Name</i>                                    | <i>Refseq</i>    | <i>Evidence</i>    | <i>Carcinoma</i>   | <i>T/CN</i> | <i>T/ON</i> |
|-----------------------------------------------------|------------------|--------------------|--------------------|-------------|-------------|
| cartilage linking protein 1                         | NM_001884        | GO and TMSC        | Breast, ER-        | 7.0         | 2.9         |
| <i>GDNF family receptor alpha 1</i>                 | <i>NM_005264</i> | <i>GO and TMSC</i> | <i>Breast, ER+</i> | <i>9.3</i>  | <i>9.0</i>  |
| Lipophilin B                                        | NM_006551        | GO and TMSC        | Breast, ER+/-      | 47.5        | 89.7        |
| small inducible cytokine subfamily B10              | NM_001565        | GO and TMSC        | Breast, ER+/-      | 10.3        | 6.9         |
| small inducible cytokine subfamily B11              | NM_005409        | GO and TMSC        | Breast, ER+/-      | 8.1         | 3.7         |
| collagen, type XI, alpha 1                          | NM_001854        | GO and TMSC        | Breast, ER+/-      | 57.3        | 2.7         |
| <i>tumor necrosis factor (ligand) superfamily 9</i> | <i>NM_003811</i> | <i>GO and TMSC</i> | <i>Gastric</i>     | <i>3.6</i>  | <i>3.6</i>  |
| <b>angiopoietin 2</b>                               | NM_001147        | GO and TMSC        | Kidney             | 15.3        | 13.3        |
| <b>insulin-like growth factor 2 (somatomedin A)</b> | NM_000612        | GO and TMSC        | Kidney             | 50.9        | 8.3         |
| TNF, alpha-induced protein 6                        | NM_007115        | GO and TMSC        | Kidney             | 10.3        | 4.5         |
| adrenomedullin                                      | NM_001124        | GO and TMSC        | Kidney             | 3.4         | 3.4         |
| insulin-like growth factor binding protein 3        | NM_000598        | GO and TMSC        | Kidney             | 6.5         | 2.7         |
| insulin-like growth factor binding protein 5        | NM_000599        | GO and TMSC        | Kidney             | 4.1         | 2.5         |
| <b>angiopoietin 2</b>                               | NM_001147        | GO and TMSC        | Kidney             | 3.5         | 2.5         |
| lysyl oxidase                                       | NM_002317        | GO and TMSC        | Kidney             | 3.0         | 2.4         |
| neurotensin                                         | NM_006183        | GO and TMSC        | Liver              | 96.3        | 9.0         |
| <i>cytokine receptor-like factor 1</i>              | <i>NM_004750</i> | <i>GO and TMSC</i> | <i>Lung, AdCa</i>  | <i>16.2</i> | <i>8.5</i>  |
| gastrin-releasing peptide                           | NM_002091        | GO and TMSC        | Lung, other        | 16.5        | 10.4        |
| arginine vasopressin                                | NM_000490        | GO and TMSC        | Lung, other        | 4.5         | 5.3         |
| pentaxin-related gene                               | NM_002852        | GO and TMSC        | Lung, other        | 15.1        | 4.2         |
| small inducible cytokine subfamily A20              | NM_004591        | GO and TMSC        | Lung, other        | 5.6         | 3.0         |
| matrix metalloproteinase 10                         | NM_002425        | GO and TMSC        | Lung, SCC          | 15.1        | 18.0        |
| matrix metalloproteinase 13                         | NM_002427        | GO and TMSC        | Lung, SCC          | 7.4         | 7.4         |
| matrix metalloproteinase 1                          | NM_002421        | GO and TMSC        | Lung, SCC          | 24.0        | 5.9         |
| heparin-binding growth factor binding               | NM_005130        | GO and TMSC        | Lung, SCC          | 24.5        | 2.7         |
| matrix metalloproteinase 12                         | NM_002426        | GO and TMSC        | Lung, SCC          | 32.2        | 2.1         |
| neuromedin U                                        | NM_006681        | GO and TMSC        | Ovary              | 12.1        | 5.3         |
| <b>insulin-like growth factor 2 (somatomedin A)</b> | NM_000612        | GO and TMSC        | Ovary              | 28.5        | 3.2         |
| kallikrein 10                                       | NM_002776        | GO and TMSC        | Ovary              | 5.1         | 2.4         |
| relaxin 1 (H1)                                      | NM_006911        | GO and TMSC        | Prostate           | 4.6         | 7.8         |
| neuropeptide Y                                      | NM_000905        | GO and TMSC        | Prostate           | 4.7         | 5.2         |
| MIC-1                                               | NM_004864        | GO and TMSC        | Prostate           | 6.7         | 3.5         |
| mucin 2, intestinal/tracheal                        | NM_002457        | GO only            | Colon              | 8.8         | 5.3         |
| interleukin 18                                      | NM_001562        | GO only            | Gastric            | 3.8         | 2.6         |
| Indian hedgehog homolog (Drosophila)                | none             | GO only            | Gastric            | 4.7         | 2.4         |
| <i>adipose differentiation-related protein</i>      | <i>NM_001122</i> | <i>GO only</i>     | <i>Kidney</i>      | <i>9.6</i>  | <i>2.6</i>  |

| <i>Gene Name</i>                                   | <i>Refseq</i>    | <i>Evidence</i>  | <i>Carcinoma</i>   | <i>T/CN</i> | <i>T/ON</i> |
|----------------------------------------------------|------------------|------------------|--------------------|-------------|-------------|
| <i>vascular endothelial growth factor receptor</i> | <i>NM_002019</i> | <i>GO only</i>   | <i>Kidney</i>      | <i>3.8</i>  | <i>2.4</i>  |
| alpha-fetoprotein                                  | NM_001134        | GO only          | Liver              | 7.6         | 7.6         |
| hypocretin (orexin) receptor 1                     | NM_001525        | GO only          | Liver              | 5.4         | 5.4         |
| interleukin 1, beta                                | NM_000576        | GO only          | Lung, other        | 33.5        | 33.5        |
| <i>neurotensin receptor 1 (high affinity)</i>      | <i>NM_002531</i> | <i>GO only</i>   | <i>Lung, other</i> | <i>10.3</i> | <i>10.3</i> |
| plasminogen activator inhibitor type 1             | NM_000602        | GO only          | Lung, other        | 43.4        | 5.4         |
| <i>ephrin-B2</i>                                   | <i>NM_004093</i> | <i>GO only</i>   | <i>Lung, other</i> | <i>3.5</i>  | <i>2.8</i>  |
| interleukin 1, beta                                | NM_000576        | GO only          | Lung, other        | 3.1         | 2.2         |
| epiregulin                                         | NM_001432        | GO only          | Lung, other        | 4.2         | 2.1         |
| Galectin 7                                         | NM_002307        | GO only          | Lung, SCC          | 39.7        | 34.6        |
| plakophilin 1                                      | NM_000299        | GO only          | Lung, SCC          | 7.9         | 7.9         |
| WNT7A                                              | NM_004625        | GO only          | Ovary              | 6.2         | 6.2         |
| <i>E2F transcription factor 3</i>                  | <i>NM_001949</i> | <i>TMSC Only</i> | <i>Breast, ER-</i> | <i>10.8</i> | <i>6.6</i>  |
| FLJ20244                                           | Hs.351792        | TMSC Only        | Breast, ER-        | 3.7         | 3.7         |
| <i>carbohydrate sulfotransferase 2</i>             | <i>NM_004267</i> | <i>TMSC Only</i> | <i>Breast, ER-</i> | <i>7.9</i>  | <i>2.0</i>  |
| serine hydrolase-like                              | NM_014509        | TMSC Only        | Breast             | 17.5        | 17.5        |
| <i>FLJ13927</i>                                    | <i>Hs.343963</i> | <i>TMSC Only</i> | <i>Breast</i>      | <i>6.6</i>  | <i>11.6</i> |
| mammaglobin A                                      | NM_002411        | TMSC Only        | Breast             | 9.0         | 8.9         |
| <i>cytochrome c oxidase subunit VIc</i>            | <i>NM_004374</i> | <i>TMSC Only</i> | <i>Breast</i>      | <i>3.5</i>  | <i>2.9</i>  |
| mammaglobin B                                      | NM_002407        | TMSC Only        | Breast             | 14.2        | 2.6         |
| defensin, alpha 6, Paneth cell-specific            | NM_001926        | TMSC Only        | Gastric            | 20.5        | 5.7         |
| <i>proline 4-hydroxylase</i>                       | <i>NM_000918</i> | <i>TMSC Only</i> | <i>Gastric</i>     | <i>4.3</i>  | <i>4.3</i>  |
| defensin, alpha 5, Paneth cell-specific            | NM_021010        | TMSC Only        | Gastric            | 3.8         | 3.9         |
| endothelial cell-specific molecule 1               | NM_007036        | TMSC Only        | Kidney             | 6.6         | 6.5         |
| <i>cerebroside sulfotransferase</i>                | <i>NM_004861</i> | <i>TMSC Only</i> | <i>Kidney</i>      | <i>9.9</i>  | <i>6.3</i>  |
| vanin 1                                            | NM_004666        | TMSC Only        | Kidney             | 4.9         | 4.9         |
| <i>TNF-r superfamily, member 17</i>                | <i>NM_001192</i> | <i>TMSC Only</i> | <i>Liver</i>       | <i>4.2</i>  | <i>3.1</i>  |
| bone morphogenetic protein 6                       | NM_001718        | TMSC Only        | Lung, AdCa         | 3.1         | 3.1         |
| <i>Zic family member 3 heterotaxy 1</i>            | <i>NM_003413</i> | <i>TMSC Only</i> | <i>Lung, other</i> | <i>6.5</i>  | <i>6.5</i>  |
| <i>achaete-scute complex-like 1 (Drosophila)</i>   | <i>NM_004316</i> | <i>TMSC Only</i> | <i>Lung, other</i> | <i>55.2</i> | <i>5.7</i>  |
| <i>achaete-scute complex-like 1 (Drosophila)</i>   | <i>NM_004316</i> | <i>TMSC Only</i> | <i>Lung, other</i> | <i>28.9</i> | <i>5.1</i>  |
| maspin                                             | NM_002640        | TMSC Only        | Lung, other        | 4.6         | 4.6         |
| TSS candidate 3                                    | <i>NM_003311</i> | <i>TMSC Only</i> | <i>Lung, other</i> | <i>10.8</i> | <i>4.3</i>  |
| <i>TSS candidate 3</i>                             | <i>NM_003311</i> | <i>TMSC Only</i> | <i>Lung, other</i> | <i>7.1</i>  | <i>2.4</i>  |
| <i>transcription factor A, mitochondrial</i>       | <i>NM_003201</i> | <i>TMSC Only</i> | <i>Lung, other</i> | <i>3.4</i>  | <i>2.1</i>  |
| <i>lymphocyte antigen 6 complex, locus D</i>       | <i>NM_003695</i> | <i>TMSC Only</i> | <i>Lung, SCC</i>   | <i>50.7</i> | <i>14.5</i> |
| maspin                                             | NM_002639        | TMSC Only        | Lung, SCC          | 68.1        | 5.5         |
| maspin                                             | NM_002639        | TMSC Only        | Lung, SCC          | 29.3        | 3.4         |
| <i>GPI-anchored metastasis protein</i>             | <i>NM_014400</i> | <i>TMSC Only</i> | <i>Lung, SCC</i>   | <i>5.0</i>  | <i>2.5</i>  |

| <i>Gene Name</i>                            | <i>Refseq</i>    | <i>Evidence</i>  | <i>Carcinoma</i> | <i>T/CN</i> | <i>T/ON</i> |
|---------------------------------------------|------------------|------------------|------------------|-------------|-------------|
| <i>melanoma antigen, family A, 5</i>        | <i>NM_021049</i> | <i>TMSC Only</i> | <i>Lung, SCC</i> | <i>4.8</i>  | <i>2.2</i>  |
| kallikrein 6 (neurosin, zyme)               | NM_002774        | TMSC Only        | Ovary            | 15.2        | 2.1         |
| <i>mesothelin</i>                           | <i>NM_005823</i> | <i>TMSC Only</i> | <i>Ovary</i>     | <i>23.0</i> | <i>2.1</i>  |
| pancreatic thread protein-like (rat)        | NM_006508        | TMSC Only        | Pancreas         | 3.3         | 13.3        |
| <i>prostate-specific membrane antigen</i>   | <i>NM_004476</i> | <i>TMSC Only</i> | <i>Prostate</i>  | <i>3.9</i>  | <i>4.9</i>  |
| <i>prostate-specific membrane antigen</i>   | <i>Hs.283946</i> | <i>TMSC Only</i> | <i>Prostate</i>  | <i>4.2</i>  | <i>4.2</i>  |
| <i>prostate-specific membrane antigen</i>   | <i>NM_004476</i> | <i>TMSC Only</i> | <i>Prostate</i>  | <i>3.9</i>  | <i>3.6</i>  |
| <i>single-minded homolog 2 (Drosophila)</i> | <i>NM_005069</i> | <i>TMSC Only</i> | <i>Prostate</i>  | <i>10.6</i> | <i>2.7</i>  |

T/CN, ratio of expression of tumor tissue and corresponding normal tissue. T/OtherN, ratio of expression of tumor tissue and “other” normal tissues. Evidence, whether the genes were identified by GO annotations and sequence analysis (GO and TMSC); GO annotations alone (GO Only) or sequence analysis alone (TMSC Only). Breast, ER+, estrogen receptor positive breast carcinoma; Breast, ER-, estrogen receptor negative breast carcinoma; Breast, ER+/-, breast carcinoma with undetermined estrogen receptor status; Lung, AdCa, lung adenocarcinoma; Lung, SCC, lung squamous cell carcinoma; Lung, other, lung carcinomas with histologies other than squamous or adenocarcinoma. Genes represented by multiple probe-sets are indicated in red. Genes highlighted by italics and shaded in blue or red are not secreted.
